# Supplementary material for: Enhanced Solar Light Photocatalytic Activity of Ag Doped TiO2–Ag3PO4 Composites
Source: PubMed Central journal article supplement (PMC7221970; doi:10.3390/nano10040795), 2020-04-21
Supplement: nanomaterials-10-00795-s001.pdf [file nanomaterials-10-00795-s001.pdf]

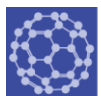

# Supplementary Materials: Enhanced Solar Light Photocatalytic Activity of Ag Doped $\text{TiO}_2$ - $\text{Ag}_3\text{PO}_4$ Composites

Abdessalem Hamrouni <sup>1</sup>, Hanen Azouzi <sup>1</sup>, Ali Rayes <sup>1</sup>, Leonardo Palmisano <sup>2</sup>, Riccardo Ceccato <sup>3</sup> and Francesco Parrino <sup>3,\*</sup>

<sup>1</sup> Laboratoire de Recherche Catalyse et Matériaux pour l'Environnement et les Procédés URCEMPEP (UR11ES85), Faculté des Sciences de Gabès, Université de Gabès, Campus Universitaire Cité Erriadh, Gabès 6072, Tunisia; hamrouni-28@hotmail.fr (A.H.); hanenazzouzi408@gmail.com (H.A.); ali.rayes@fsb.rnu.tn (A.R.)

<sup>2</sup> Department of Engineering, University of Palermo, Viale delle Scienze, Ed. 6, 90128 Palermo, Italy; leonardo.palmisano@unipa.it

<sup>3</sup> Department of Industrial Engineering, University of Trento, Via Sommarive 9, 38123 Trento, Italy; riccardo.ceccato@unitn.it

\* Correspondence: francesco.parrino@unitn.it

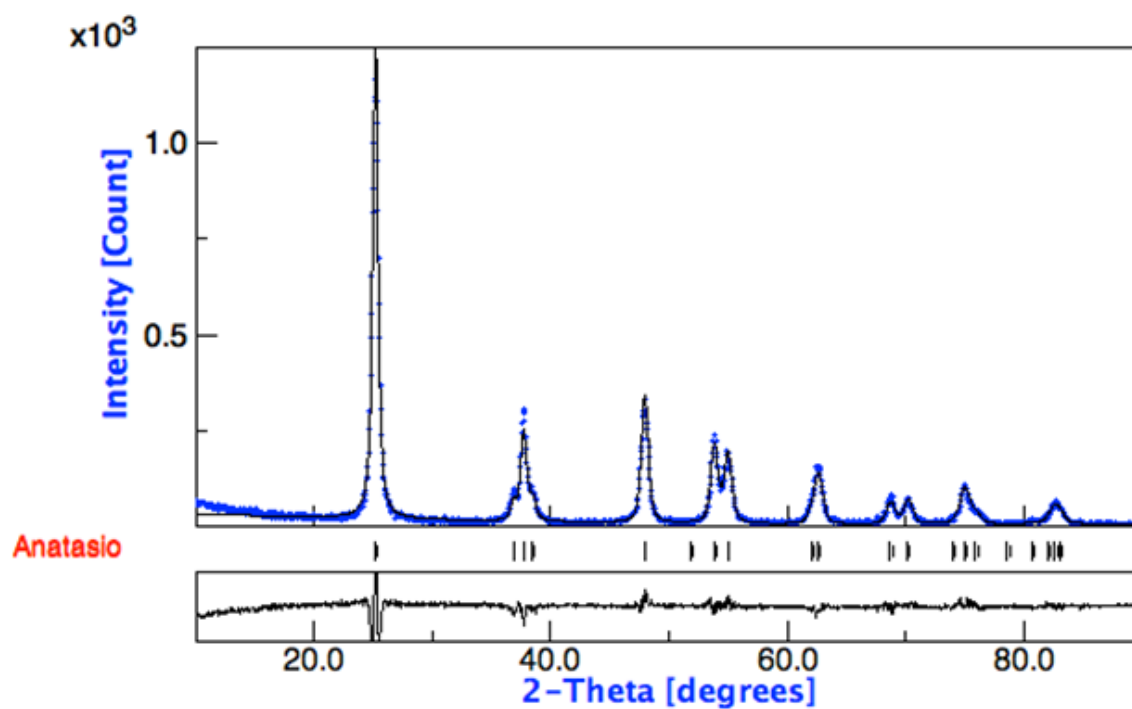

Figure S1. XRD patterns of the  $\text{TiO}_2$  sample.

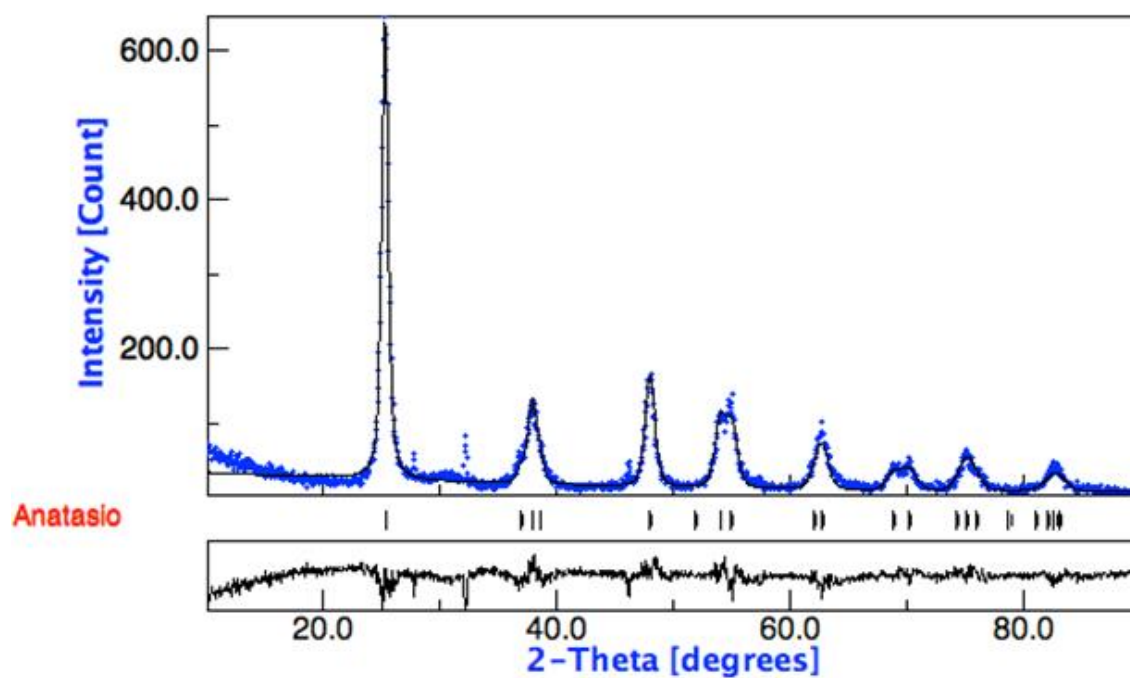

Figure S2. XRD patterns of the Ag@TiO<sub>2</sub> sample.

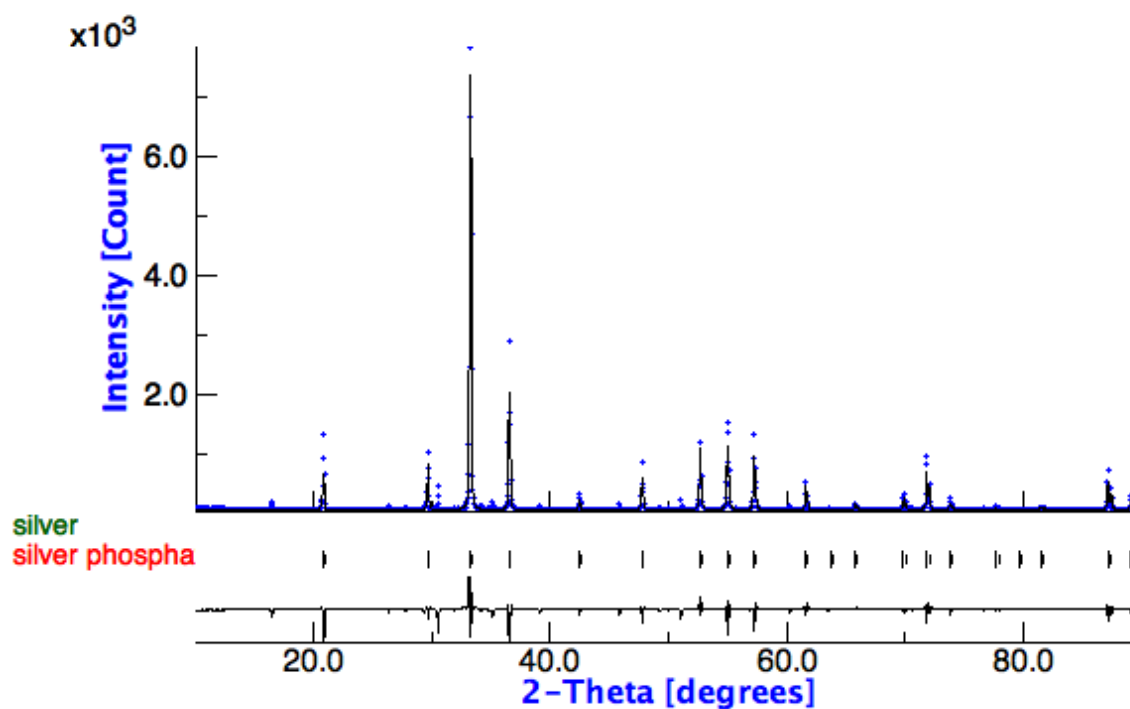

Figure S3. XRD patterns of the Ag<sub>3</sub>PO<sub>4</sub> sample.

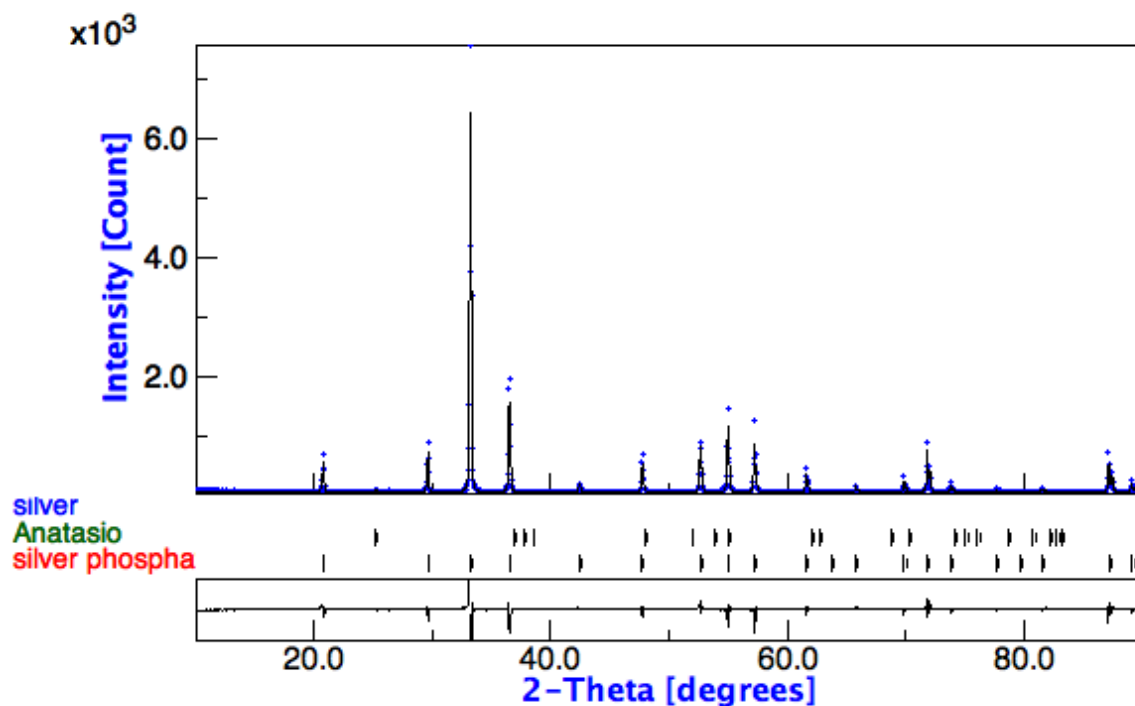

Figure S4. XRD patterns of the TiO<sub>2</sub>-Ag<sub>3</sub>PO<sub>4</sub> sample.

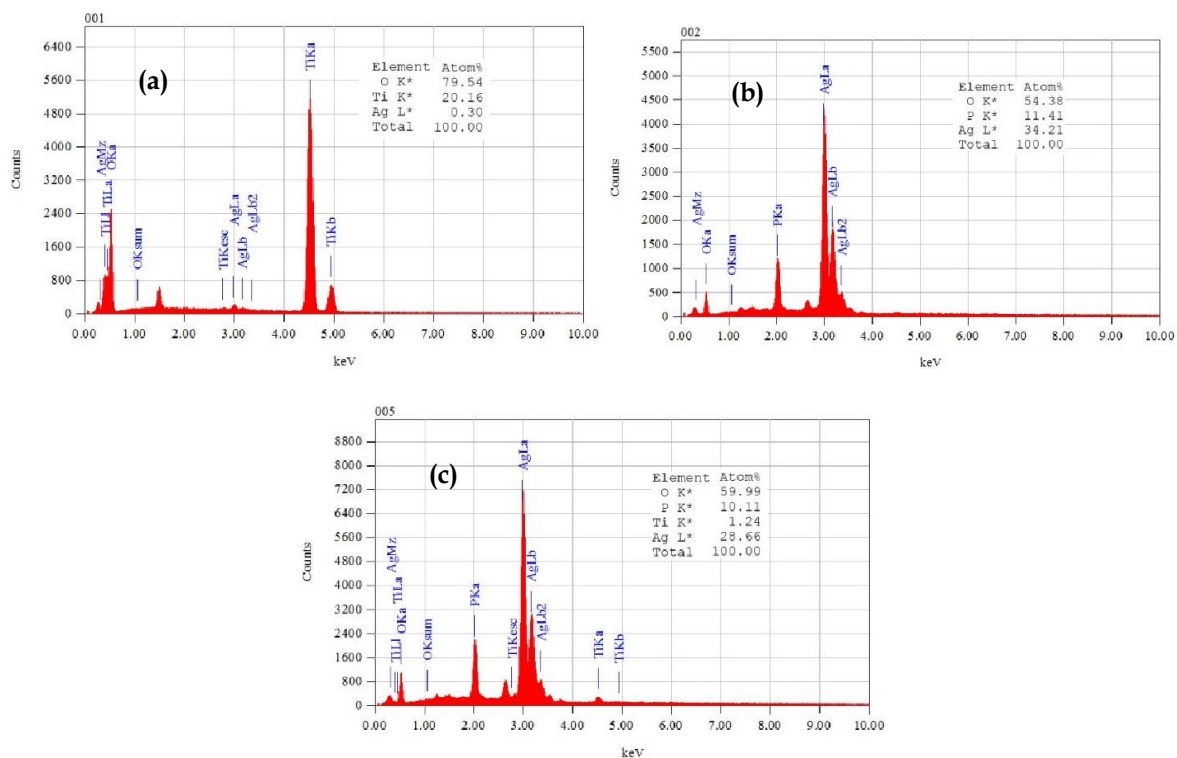

Figure S5. EDS analysis of (a) Ag<sub>3</sub>PO<sub>4</sub>, (b) Ag@TiO<sub>2</sub> and (c) Ag@TiO<sub>2</sub>-Ag<sub>3</sub>PO<sub>4</sub> samples.

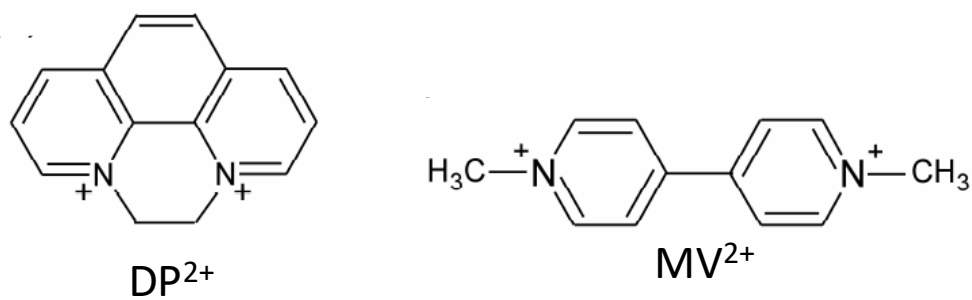

**Figure S6.** Structures of the electron acceptors DP<sup>2+</sup> and MV<sup>2+</sup>.
